# Supplementary material for: Individuelle und arbeitsbezogene Herausforderungen der Pflegekräfte in stationären Pflegeeinrichtungen während der COVID-19-Pandemie in Deutschland
Source: Springer Nature journal article supplement (doi:10.1007/s40664-023-00524-x), 2023-12-12
Supplement: MOESM1 [file 26519408]

**Elektronischer Anhang.** Nähere Beschreibung der eingeschlossenen Studien.

| <b>Zitation<br/>snr.</b> | <b>Studie</b>                                                                                                                                                                                                                                            | <b>Daten-<br/>format</b> | <b>Studiendesign</b>                                                                                              | <b>Tätigkeits<br/>bereich</b>                                                  | <b>Stichprobe</b>                                                                                                                                                    | <b>Stichproben<br/>größe (N)</b>                                                                                                                          | <b>Erhebungs<br/>region</b> | <b>Erhebungs<br/>zeitraum</b>                                                                                                                                          |
|--------------------------|----------------------------------------------------------------------------------------------------------------------------------------------------------------------------------------------------------------------------------------------------------|--------------------------|-------------------------------------------------------------------------------------------------------------------|--------------------------------------------------------------------------------|----------------------------------------------------------------------------------------------------------------------------------------------------------------------|-----------------------------------------------------------------------------------------------------------------------------------------------------------|-----------------------------|------------------------------------------------------------------------------------------------------------------------------------------------------------------------|
| 3                        | Begerow A, Gaidys U (2022) „Ich stehe jeden Dienst mit mir selbst im Konflikt“ – „Moral distress“ bei Altenpflegenden während der COVID-19-Pandemie. HBSscience 13:59–68.                                                                                | qualitativ               | Online-Survey                                                                                                     | stationäre<br>Langzeitpflege                                                   | Altenpflegekräfte                                                                                                                                                    | 510                                                                                                                                                       | deutschland<br>weit         | April 2020 bis<br>Februar 2021                                                                                                                                         |
| 4                        | Begerow A, Michaelis U, Gaidys U (2020) Wahrnehmungen von Pflegenden im Bereich der Intensivpflege während der COVID-19-Pandemie. Pflege 33(4):229–236                                                                                                   | qualitativ               | Online-Survey                                                                                                     | Krankenhaus                                                                    | Pflegkräfte aus dem<br>Intensivbereich                                                                                                                               | 397                                                                                                                                                       | deutschland<br>weit         | April 2020                                                                                                                                                             |
| 7                        | Diehl E, Hiss D, Wege A, Hirschmüller A, Nienhaus A, Letzel S (2022) Experiences of nurses in nursing homes during the COVID-19 pandemic in Germany: A qualitative study. Geriatrics 7(5):94.                                                            | qualitativ               | semistrukturierte<br>Interviewstudie                                                                              | stationäre<br>Langzeitpflege                                                   | Altenpflegekräfte                                                                                                                                                    | 10                                                                                                                                                        | Rheinland-<br>Pfalz         | März 2021 bis<br>Juni 2021                                                                                                                                             |
| 9                        | Dürr L, Forster A, Bartsch CE, Koob C (2021) Anforderungen, Ressourcen und Arbeitsengagement Pflegenden während der zweiten Welle der COVID-19-Pandemie. Pflege 35:5–14                                                                                  | quantitativ              | Online-Survey                                                                                                     | Krankenhaus,<br>stationäre<br>Langzeitpflege,<br>ambulante Pflege,<br>sonstige | Pflegende, die in<br>Gesundheitsbetrieben<br>in Deutschland in der<br>direkten Versorgung von<br>Patient*innen<br>sowie Bewohnenden<br>tätig waren                   | 1027                                                                                                                                                      | deutschland<br>weit         | 20.11.2020 bis<br>07.12.2020                                                                                                                                           |
| 10                       | Elsbernd A, Heidecker L, Schüttemeier B (2021) Studie zur aktuellen Lage in Einrichtungen der stationären und ambulanten Langzeitpflege in Baden-Württemberg (Lacovid-BA-WÜ2020). Ministerium für Soziales, Gesundheit und Integration Baden-Württemberg | mixed-<br>method         | Leitfaden-<br>gestützte<br>Interviews<br><br>qualitatives<br>schriftliches<br>Online-<br>Befragungsinstr<br>ument | stationäre<br>Langzeitpflege                                                   | qualitative Befragungen:<br>Bewohner*innen,<br>Angehörige,<br>Mitarbeiter*innen aus der<br>Pflege und<br>Führungspersonen<br>aus unterschiedlichen<br>Führungsebenen | leitfadengestütz<br>tes Interview:<br>89 Interviews<br>mit 107<br>Personen<br><br>qualitatives<br>schriftliches<br>Online-<br>Befragungsinstr<br>ument: 9 | Baden-<br>Württem-<br>berg  | Interviews und<br>qualitatives<br>schriftliches<br>Online-<br>Befragungsinstr<br>ument:<br>August 2020 bis<br>April 2021<br><br>Fragebogen zur<br>Teststrategie<br>und |

|    |                                                                                                                                                                                                                                                                 |             | Fragebogen zur Teststrategie und Schnelltests quantitatives Online-Survey |                                                                                                           | quantitative Befragung: Führungspersonen aus unterschiedlichen Führungsebenen, pflegerische Tätigkeit, betreuerische Tätigkeit; Hauswirtschaft und Verwaltung | Fragebogen zur Teststrategie und Schnelltests: 20 Quantitativer Online-Survey: 490 |                                                | Schnelltests: November 2020<br><br>quantitatives Online-Survey: 07.04.2021 bis 16.05 2021 |
|----|-----------------------------------------------------------------------------------------------------------------------------------------------------------------------------------------------------------------------------------------------------------------|-------------|---------------------------------------------------------------------------|-----------------------------------------------------------------------------------------------------------|---------------------------------------------------------------------------------------------------------------------------------------------------------------|------------------------------------------------------------------------------------|------------------------------------------------|-------------------------------------------------------------------------------------------|
| 12 | Gräske J, Lengert-Brzozowski S, Neumann F, Görsch L, Biniok M, Koppe L (2020) COVID-19-Pandemie in Berlin und Brandenburg–Eine Ist-Analyse in Krankenhäusern aus Sicht des Pflegemanagements. Pflege 34:3–12                                                    | quantitativ | Online-Survey                                                             | Krankenhaus                                                                                               | Pflegedienstleitungen, Pflegedirektor*innen oder pflegerischen Leitungen                                                                                      | 31 Krankenhäuser                                                                   | Berlin-Brandenburg                             | April 2020                                                                                |
| 13 | Hamacher J, Klausmeier J (2020) Intensivpflege während der Covid-19-Pandemie: eine standardisierte Onlinebefragung. Master Thesis, Katholische Hochschule Nordrhein-Westfalen Köln                                                                              | quantitativ | Online-Survey                                                             | Krankenhaus                                                                                               | Intensivpflegekräfte                                                                                                                                          | 580                                                                                | deutschland weit (54% aus Nordrhein-Westfalen) | April 2020                                                                                |
| 15 | Höller I, Forkmann T (2022) Ambivalent heroism?–Psychological burdens and suicidal ideation among nurses during the Covid-19 pandemic. Nurs Open 9(1):785–800                                                                                                   | quantitativ | Online-Survey                                                             | Krankenhaus                                                                                               | Pflegekräfte                                                                                                                                                  | 1311                                                                               | deutschland weit                               | Februar 2021 bis April 2021                                                               |
| 16 | Hörsch D (2021) Covid-19-Pflegestudie der Diakonie. Eine Ad-hoc-Studie zu den Erfahrungen von Diakonie-Mitarbeitenden in der Altenhilfe/-pflege während der Covid-19-Pandemie. midi /Ev. Werk für Diakonie und Entwicklung e.V., Berlin                         | quantitativ | Online-Survey                                                             | ambulante, teilstationäre und stationäre Altenpflege (ca. 63%)                                            | Führungskräfte (42%) und Pflegekräfte (42%); Verwaltung (9%); Hauswirtschaft (3%)                                                                             | 1539                                                                               | deutschland weit                               | Oktober 2020                                                                              |
| 17 | Hower KI, Pförtner TK, Pfaff H (2020) Pflegerische Versorgung in Zeiten von Corona-Drohender Systemkollaps oder normaler Wahnsinn? Wissenschaftliche Studie zu Herausforderungen und Belastungen aus der Sichtweise von Leitungskräften. Universität Köln, Köln | quantitativ | Online-Survey                                                             | stationäre Langzeitpflege (20%); Hospizdienst (3%); ambulante (65%); betreutes Wohnen (3%); sonstige (5%) | Leitungskräfte der Pflege                                                                                                                                     | 525                                                                                | deutschland weit                               | April 2020                                                                                |

|    |                                                                                                                                                                                                                                                                                                                                                        |             |                              |                       |                                                                            |                                                  |                                                            |                     |
|----|--------------------------------------------------------------------------------------------------------------------------------------------------------------------------------------------------------------------------------------------------------------------------------------------------------------------------------------------------------|-------------|------------------------------|-----------------------|----------------------------------------------------------------------------|--------------------------------------------------|------------------------------------------------------------|---------------------|
| 18 | Jerg-Bretzke L, Kempf M, Jarczok MN, Weimer K, Hirning C, Gündel H, Erism Y, Morawa E, Gesier F, Hiebel N, Weidner K, Albus C, Beschoner P (2021) Psychosocial Impact of the COVID-19 pandemic on healthcare workers and initial areas of action for intervention and prevention—The egePan/VOICE Study. Int J Environ Res Public Health 18(19):10531. | quantitativ | Online-Survey (VOICE-Studie) | verschiedene Settings | Gesundheitspersonal, mit Differenzierung nach Pflegekräften und Sanitätern | 7542 (1422 Pflegekräfte und Sanitäter)           | Universitätskliniken in Bonn, Erlangen, Dresden, Köln, Ulm | April bis Juli 2020 |
| 19 | Kaltwasser A, Pelz S, Nydahl P, Dubb R, Borzikowsky C (2021) Querschnittsstudie zu Arbeitsbedingungen und Versorgungsqualität in der Versorgung von COVID-19-Patienten. Der Anaesthetist 70(9): 753–760                                                                                                                                                | quantitativ | Online-Survey                | Krankenhaus           | Gesundheitspersonal, mit Differenzierung nach Pflegekräften                | 2212 (1988 aus Deutschland; 1620 aus der Pflege) | Deutschland, Österreich, Schweiz                           | Mai bis Juli 2020   |
| 20 | Kramer V, Papazova I, Thoma A, Kunz M, Falkai P, Schneider-Axmann T, Hierundar A, Wagner E, Hasan A. (2021) Subjective burden and perspectives of German healthcare workers during the COVID-19 pandemic. Eur Arch Psychiatry Clin Neurosci 271(2):271–281.                                                                                            | quantitativ | Online-Survey                | Krankenhaus           | Gesundheitspersonal, mit Differenzierung nach Pflegekräften                | 3669 (1317 Pflegekräfte)                         | deutschland weit                                           | April bis Mai 2020  |
| 22 | Morawa E, Schug C, Geiser F, Beschoner P, Jerg-Bretzke L, Albus C, Weidner K, Hiebel N, Borho A, Erim Y (2021) Psychosocial burden and working conditions during the COVID-19 pandemic in Germany: The VOICE survey among 3678 health care workers in hospitals. J Psychosom Res 144:110415                                                            | quantitativ | Online-Survey                | Krankenhaus           | Gesundheitspersonal, mit Differenzierung nach Pflegekräften                | 3678 (1275 Pflegekräfte)                         | Universitätskliniken in Bonn, Erlangen, Dresden, Köln, Ulm | April bis Juli 2020 |
| 24 | Paffenholz P, Peine A, Hellmich M, Paffenholz SV, Martin L, Luedde M, Haverkamp M, Rodeburg C, Marx G, Heidenreich A, Trautwein C, Luedde T, Loosen SH (2020) Perception of the 2020 SARS-CoV-2 pandemic among medical professionals in Germany:                                                                                                       | quantitativ | Online-Survey                | verschiedene Settings | Gesundheitspersonal, mit Differenzierung nach Pflegekräften                | 2872 (848 Pflegekräfte)                          | deutschland weit                                           | März bis April 2020 |

|    |                                                                                                                                                                                                                                                                                                                                                                                                                         |              |                                                            |                                                                                                           |                                                                 |                                                 |                  |                                                                  |
|----|-------------------------------------------------------------------------------------------------------------------------------------------------------------------------------------------------------------------------------------------------------------------------------------------------------------------------------------------------------------------------------------------------------------------------|--------------|------------------------------------------------------------|-----------------------------------------------------------------------------------------------------------|-----------------------------------------------------------------|-------------------------------------------------|------------------|------------------------------------------------------------------|
|    | results from a nationwide online survey.<br>Emerg Microbes Infect 9(1):1590–1599                                                                                                                                                                                                                                                                                                                                        |              |                                                            |                                                                                                           |                                                                 |                                                 |                  |                                                                  |
| 25 | Pförtner TK, Hower KI, Pfaff H (2021) Versorgung in Zeiten von Corona- Drohender Systemkollaps oder normaler Wahnsinn? 2. wissenschaftliche Studie zu Herausforderungen und Belastungen aus der Sichtweise von Leitungskräften. IMVR – Institut für Medizinsoziologie, Versorgungsforschung und Rehabilitationswissenschaft der Humanwissenschaftlichen Fakultät und der Medizinischen Fakultät der Universität zu Köln | quantitativ  | Online-Survey                                              | stationäre Langzeitpflege (24%); Hospizdienst (3%); ambulante (66%); betreutes Wohnen (3%); sonstige (5%) | Leitungskräfte der Pflege                                       | 299                                             | deutschland weit | Dezember 2020 bis Januar 2021                                    |
| 27 | Rheindorf J, Blöcker J, Himmel C, Trost A (2020) Wie erleben Pflegefachpersonen die Corona-Pandemie? Pflege Z 73(8):50–53                                                                                                                                                                                                                                                                                               | quantitativ  | Online-Survey                                              | verschiedene Settings                                                                                     | Pflegefachpersonen in der Versorgung von COVID-19 Patient*innen | 2.051                                           | deutschland weit | April bis Mai 2020                                               |
| 28 | Rothgang H, Domhoff D, Friedrich AC, Heinze F, Preuss B, Schmidt A, Seibert K, Stolle C, Wolf-Ostermann K (2020) Pflege in Zeiten von Corona: Zentrale Ergebnisse einer deutschlandweiten Querschnittsbefragung vollstationärer Pflegeheime. Pflege 33:265–275                                                                                                                                                          | quantitativ  | Online-Survey                                              | stationäre Langzeitpflege                                                                                 | Einrichtungsleitung, Pflegedienstleitung                        | 824 Pflegeheime                                 | deutschland weit | April bis Mai 2020                                               |
| 30 | Schilder M, Mai T, Todisco L, Potocka J, Schiel F (2022) Das Erleben der Führungsrolle in der Corona-Pandemie in hessischen Allgemeinkrankenhäusern. Pflege. <a href="https://doi.org/10.1024/1012-5302/a000887">https://doi.org/10.1024/1012-5302/a000887</a>                                                                                                                                                          | qualitativ   | Interviews                                                 | Krankenhaus                                                                                               | Pflegedienstleitung; Stationsleitung                            | 26 (13 Pflegedienstleitung; 13 Stationsleitung) | Hessen           | November 2020 bis Juli 2021                                      |
| 33 | Schulze S, Merz S, Thier A, Tallarek M, König F, Uhlenbrock G, Nübling M, Lincke HJ, Rapp MA, Spallek J, Holmberg C (2022) Psychosocial burden in nurses working in nursing homes during the Covid-19 pandemic: a cross-sectional study with quantitative and qualitative data. BMC Health Serv Res 22(1):949                                                                                                           | mixed-method | quantitativer Fragebogen und semi-strukturiertes Interview | stationäre Langzeitpflege                                                                                 | Pflegekräfte und Pflegehilfskräfte                              | 37 Einrichtungen; 177 Fragebögen; 15 Interviews | Brandenburg      | Fragebogen: August bis Oktober 2020<br><br>Interviews: Juni 2021 |

|    |                                                                                                                                                                                                                                                                                                                                                     |             |                                                                     |                                        |                                                                                        |                                                        |                          |                                |
|----|-----------------------------------------------------------------------------------------------------------------------------------------------------------------------------------------------------------------------------------------------------------------------------------------------------------------------------------------------------|-------------|---------------------------------------------------------------------|----------------------------------------|----------------------------------------------------------------------------------------|--------------------------------------------------------|--------------------------|--------------------------------|
| 35 | Silies K, Schley A, Sill J, Fleischer S, Müller M, Balzer K (2020) Die COVID-19-Pandemie im akutstationären Setting aus Sicht von Führungspersonen und Hygienefachkräften in der Pflege. Pflege 33(5):289–298                                                                                                                                       | qualitativ  | semistrukturierte Interviews                                        | Krankenhaus                            | Führungskräfte; Hygienefachkräfte                                                      | 4 Krankenhäuser; 5 Führungskräfte; 3 Hygienefachkräfte | Halle, Lübeck, Rosenheim | Mai 2020                       |
| 37 | Sommerlatte S, Lugnier C, Schoffer O, Jahn P, Kraeft AL, Kourti E, Michl P, Reinacher-Schick A, Schmitt J, Birkner T, Schildmann J, Herpertz S (2023). Mental burden and moral distress among oncologists and oncology nurses in Germany during the third wave of the COVID-19 pandemic: a cross-sectional survey. J Cancer Res Clin Oncol 26:1–13. | quantitativ | Online-Survey                                                       | Krankenhaus                            | Mediziner*innen und Pflegekräfte der Onkologie, mit Differenzierung nach Pflegekräften | 141 (125 Pflegekräfte)                                 | deutschland weit         | März und Juli 2021             |
| 38 | Them RF (2021) Psychische Gesundheit professionell Pflegenden in der COVID-19-Pandemie. Bachelor Thesis, Hochschule für Angewandte Wissenschaften Hamburg                                                                                                                                                                                           | qualitativ  | Sekundärdatenanalyse der Pflegestudie von Gaidys und Begerow (2020) | Krankenhaus; stationäre Langzeitpflege | Pflegekräfte                                                                           | 2325                                                   | deutschland weit         | November 2020 bis Februar 2021 |
| 43 | Zerbini G, Ebigbo A, Reicherts P, Kunz M, Messman H (2020) Psychosocial burden of healthcare professionals in times of COVID-19—a survey conducted at the University Hospital Augsburg. Ger Med Sci 18:Doc05                                                                                                                                        | quantitativ | Online-Survey                                                       | Krankenhaus                            | Mediziner*innen und Pflegekräfte, mit Differenzierung nach Pflegekräften               | 75 Pflegekräfte, 35 Mediziner*innen                    | Augsburg                 | März bis April 2020            |
